# Supplementary material for: Hybrid Origins of Carex rostrata var. borealis and C. stenolepis, Two Problematic Taxa in Carex Section Vesicariae (Cyperaceae)
Source: PubMed Central journal article supplement (PMC5079627; doi:10.1371/journal.pone.0165430), 2016-10-25

*Carex rostrata* Stokes

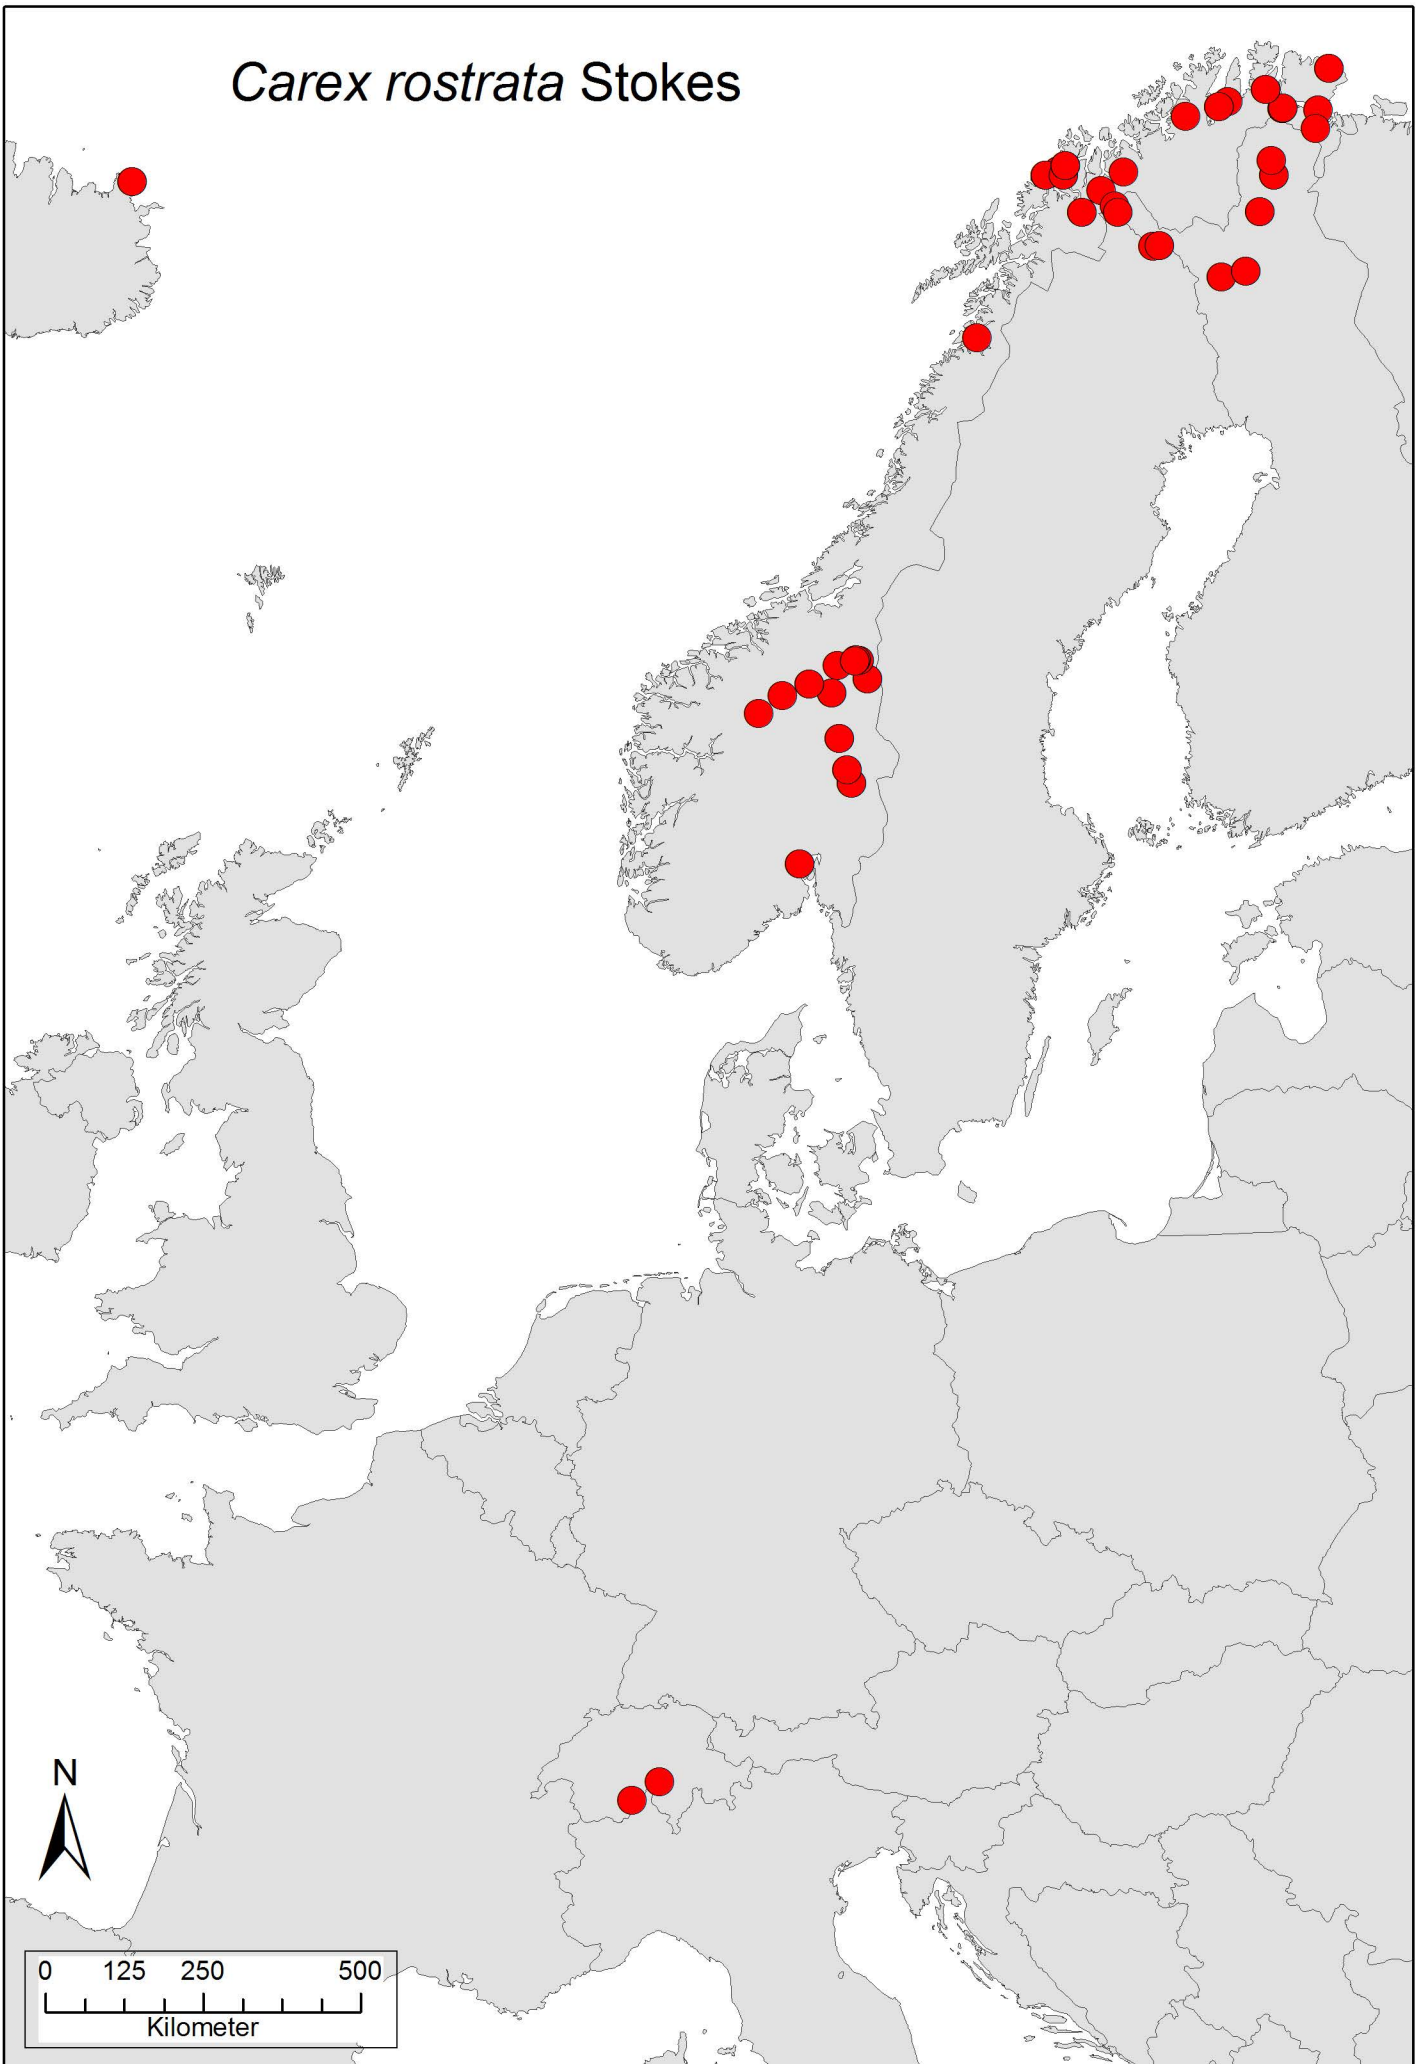

*Carex rostrata*  
var. *borealis* (Hartm.) Kük.

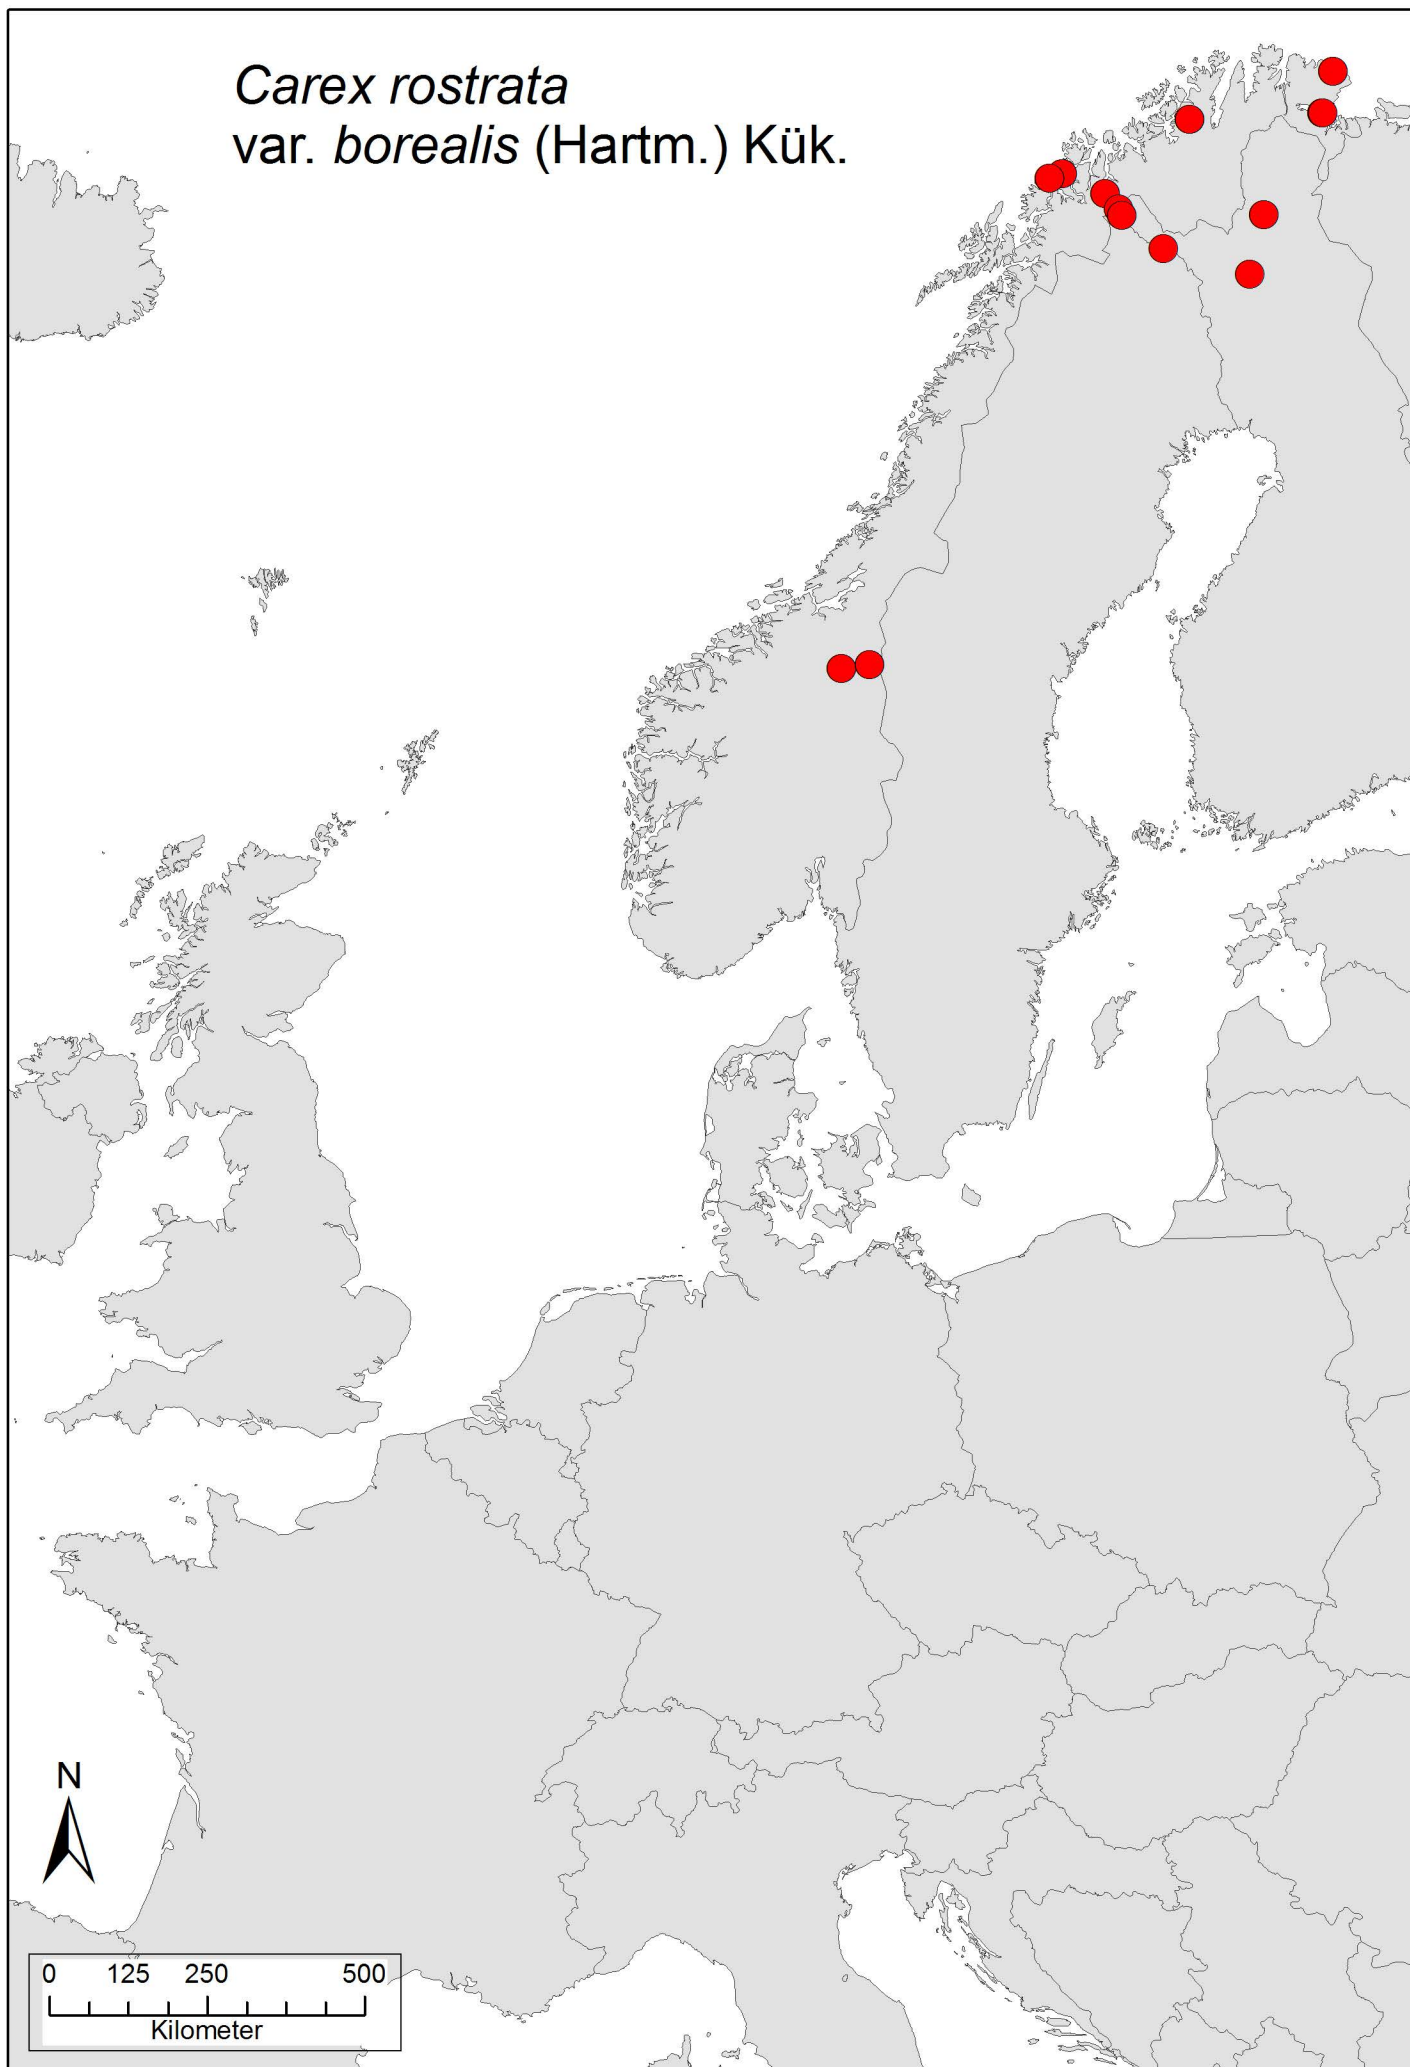

*Carex rotundata* Wahlenb.

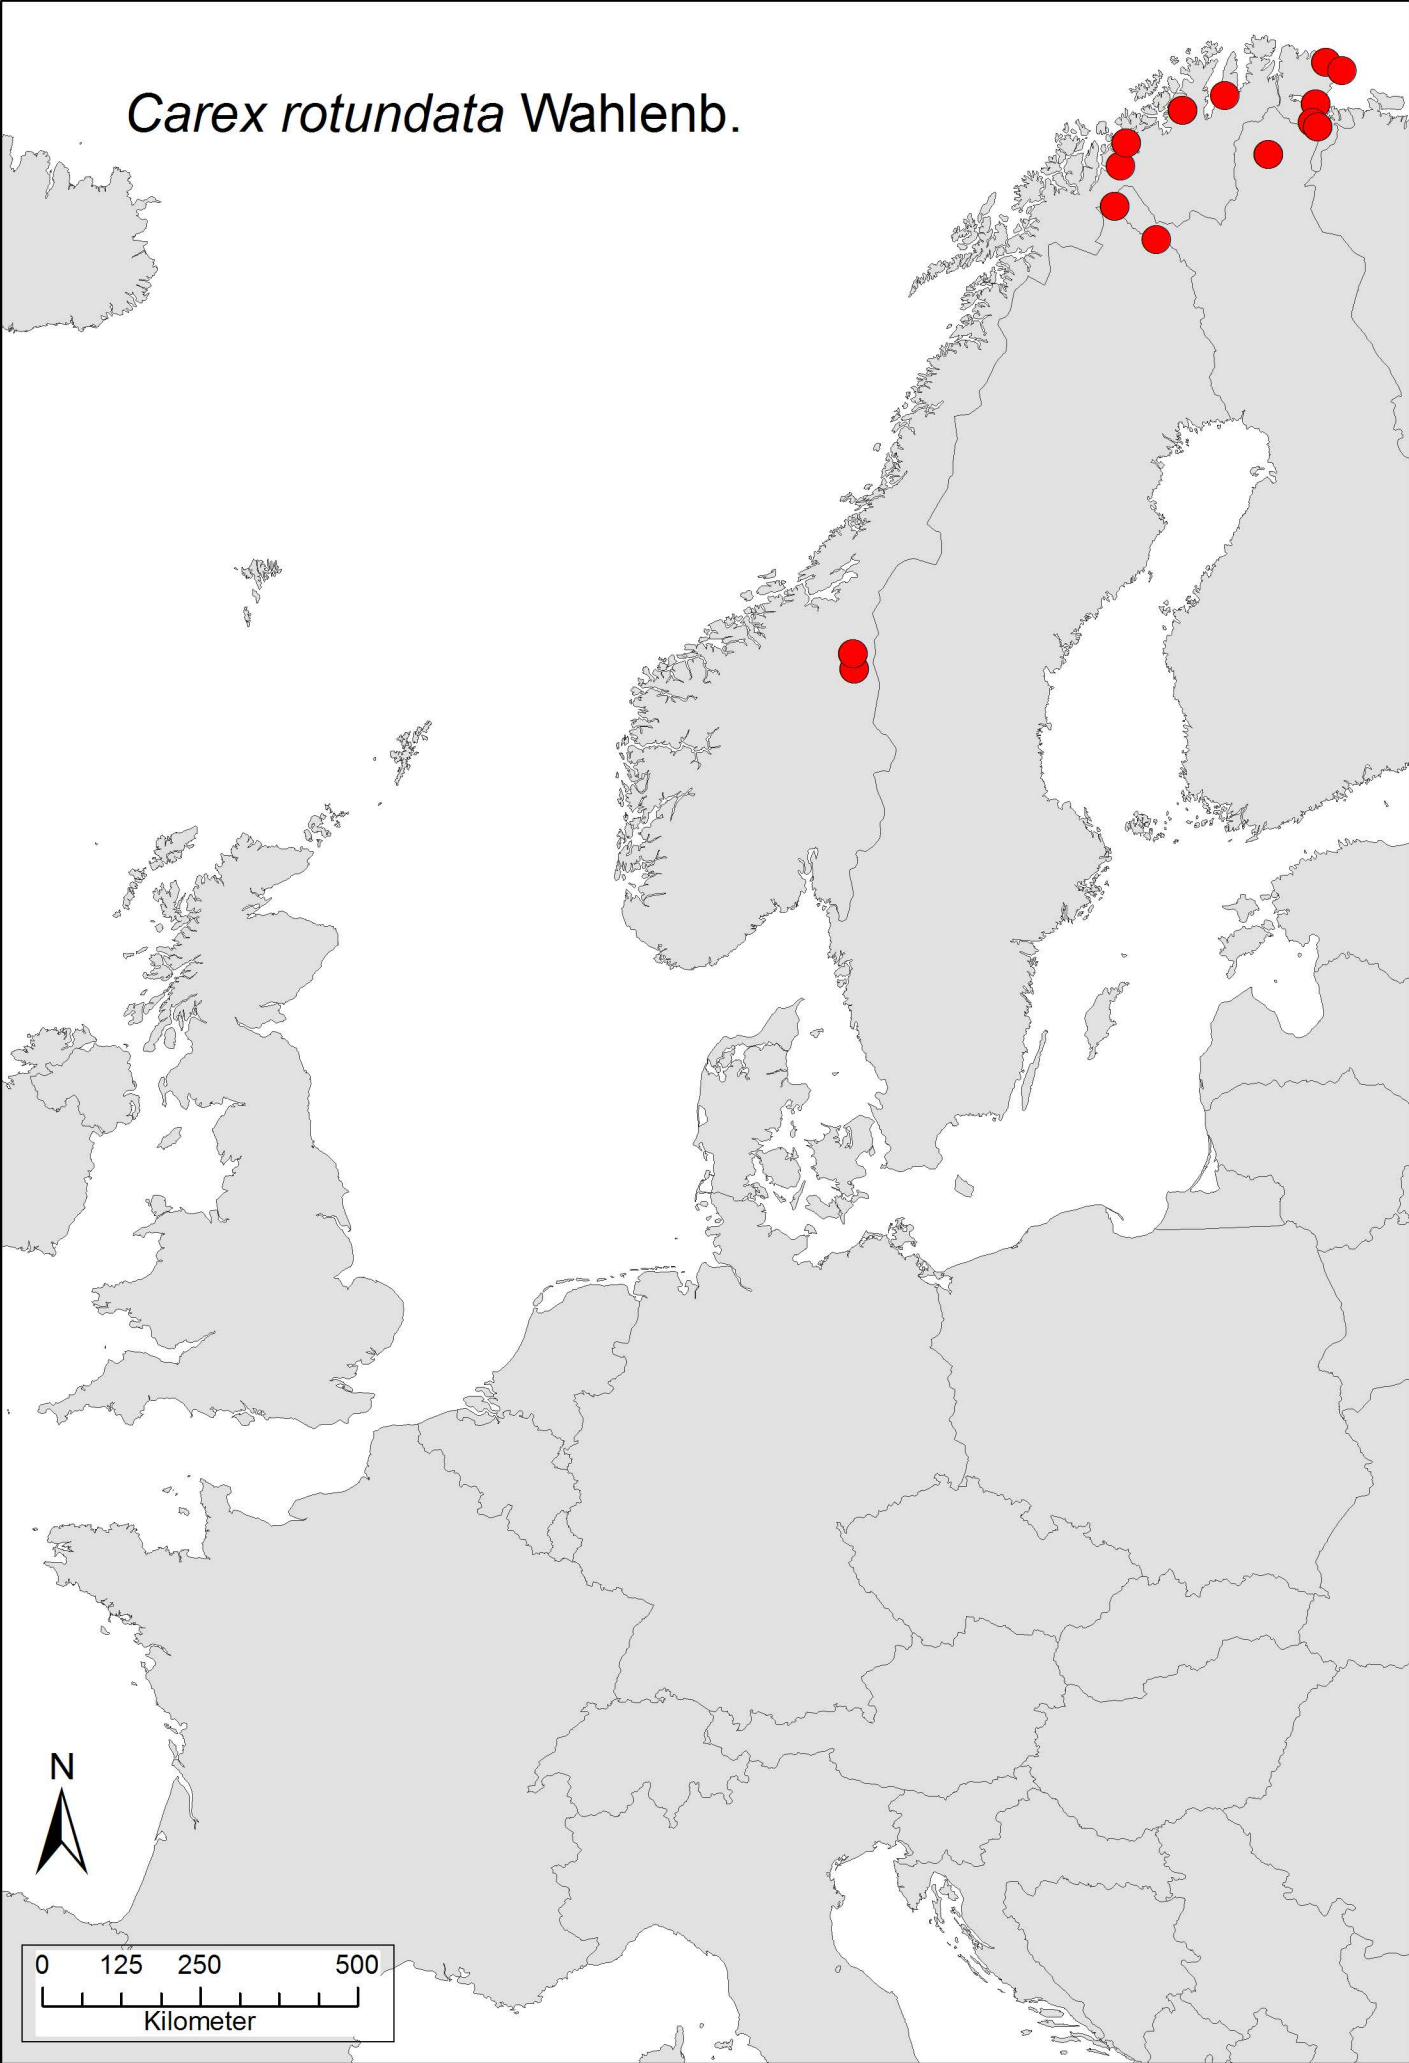

# *Carex saxatilis* L.

- subsp. *laxa* (Trautv.) Kalela
- subsp. *saxatilis*

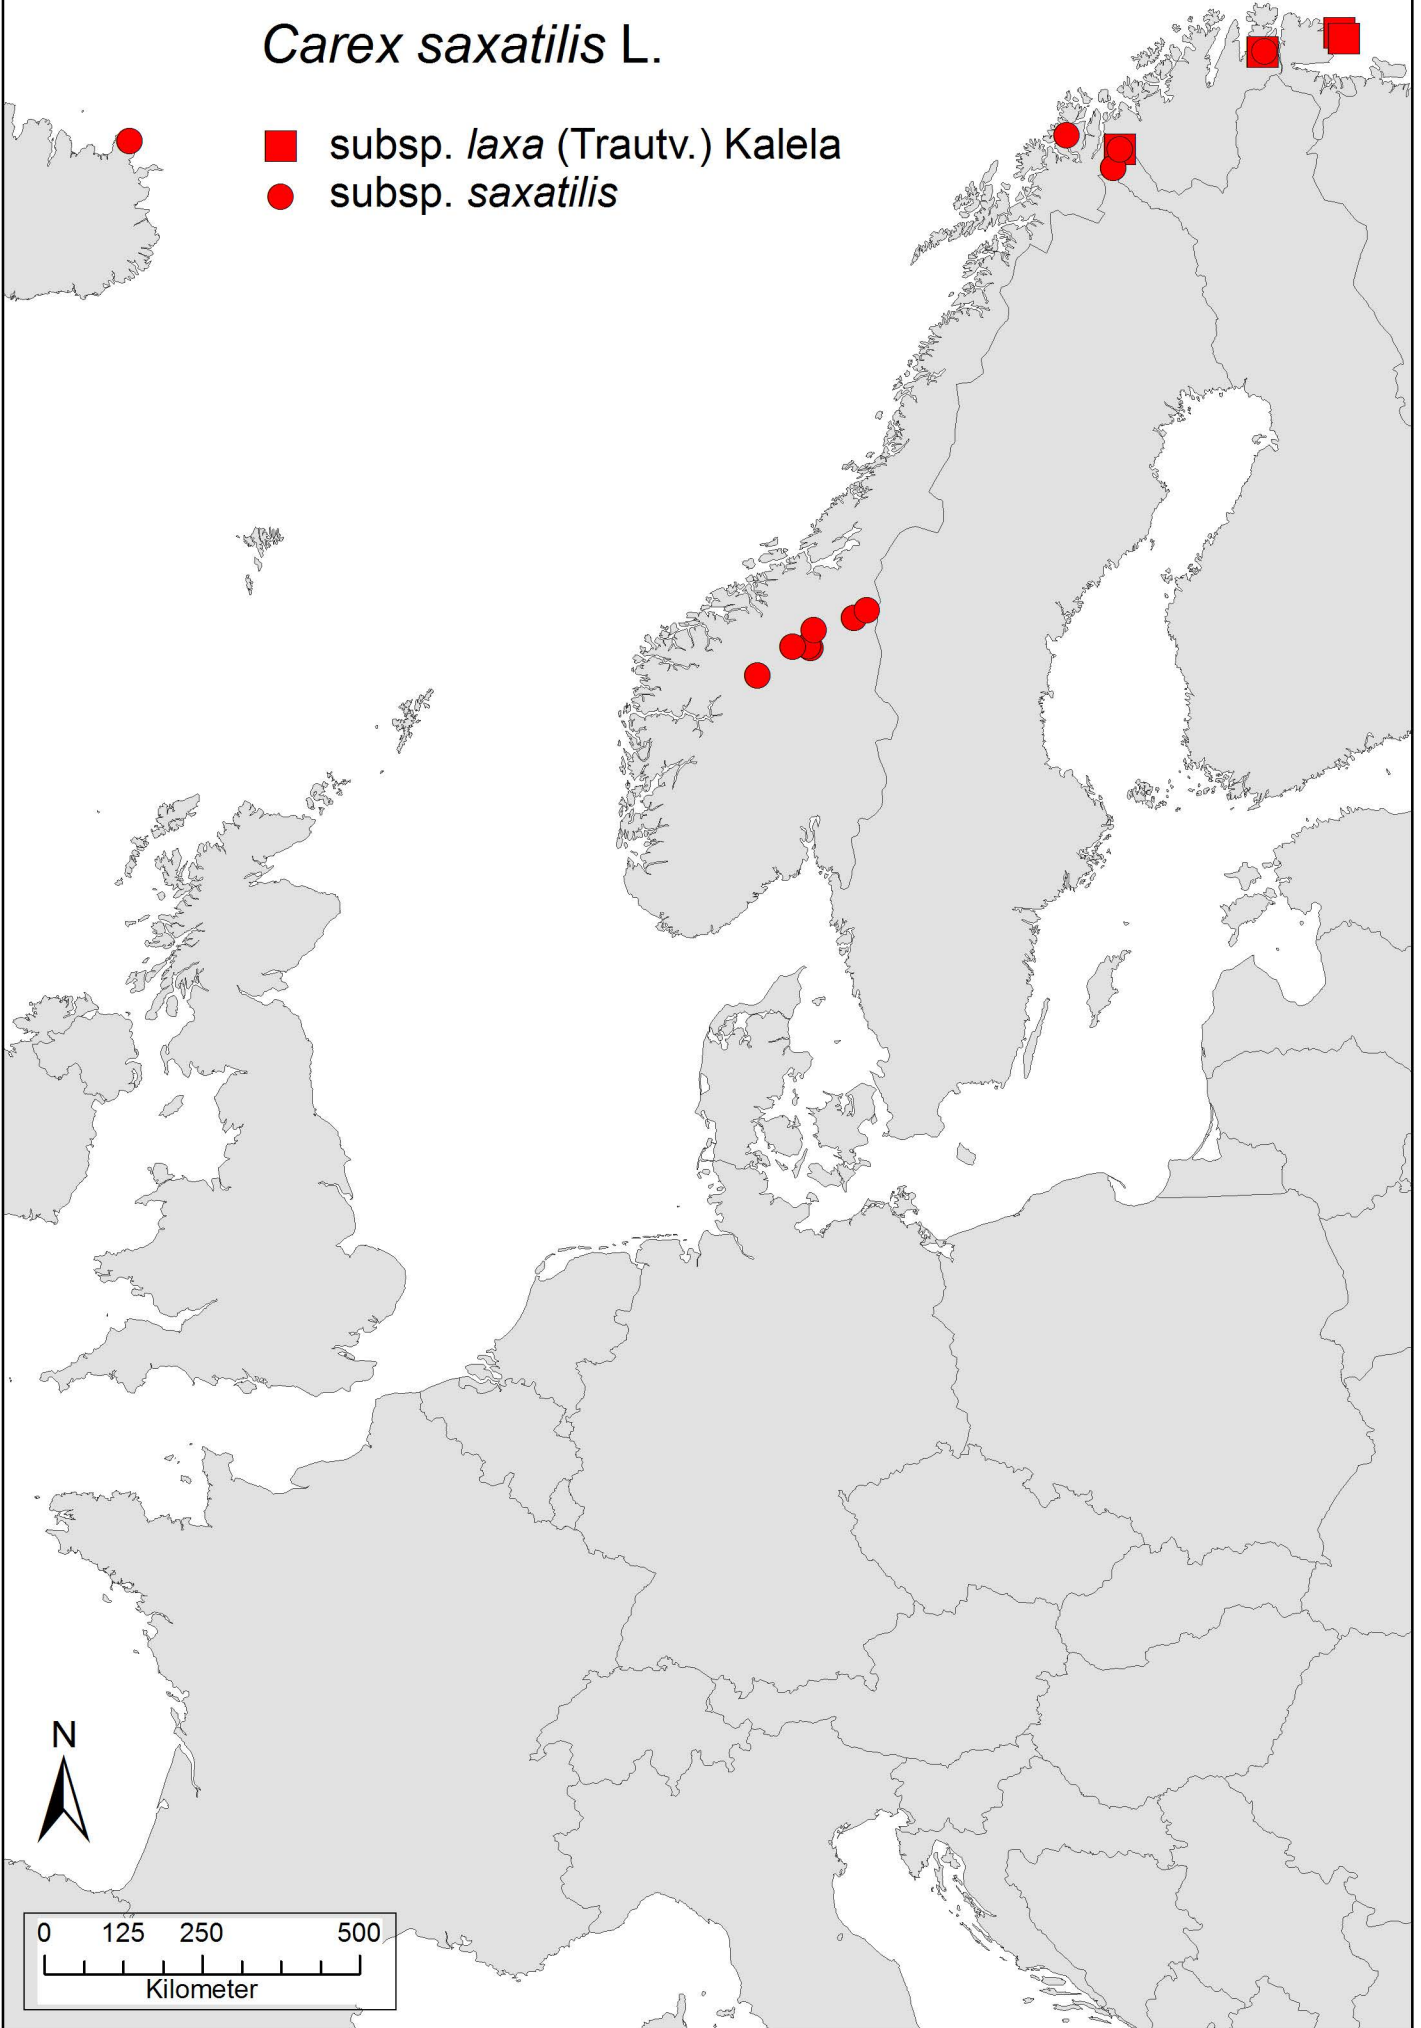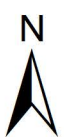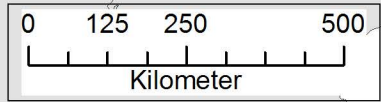

*Carex stenolepis* Less.

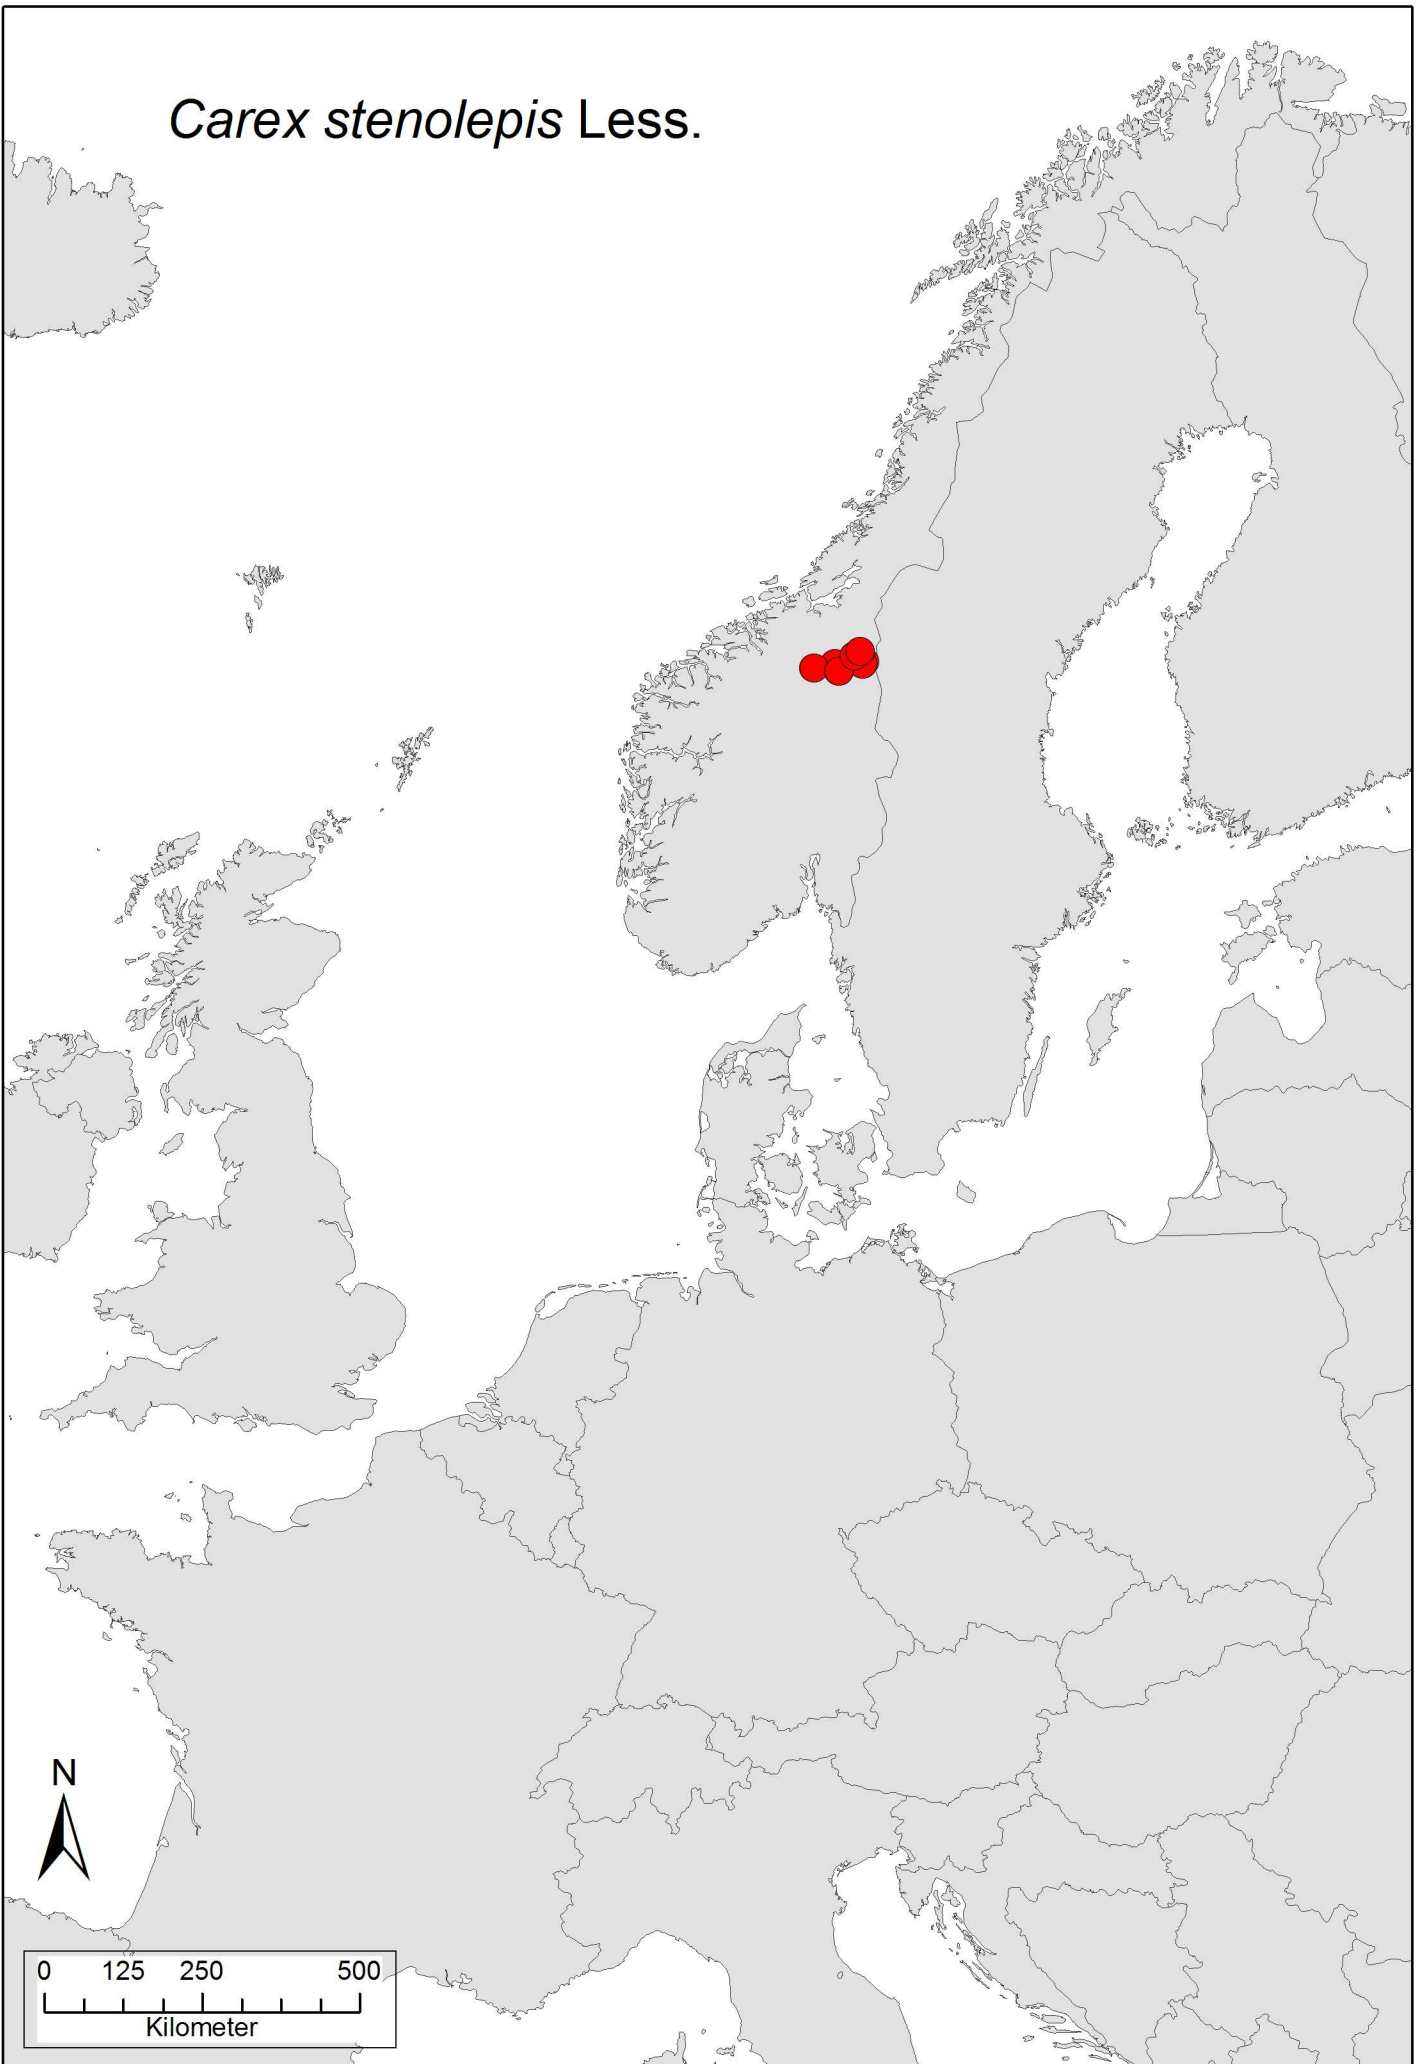

*Carex vesicaria* L.

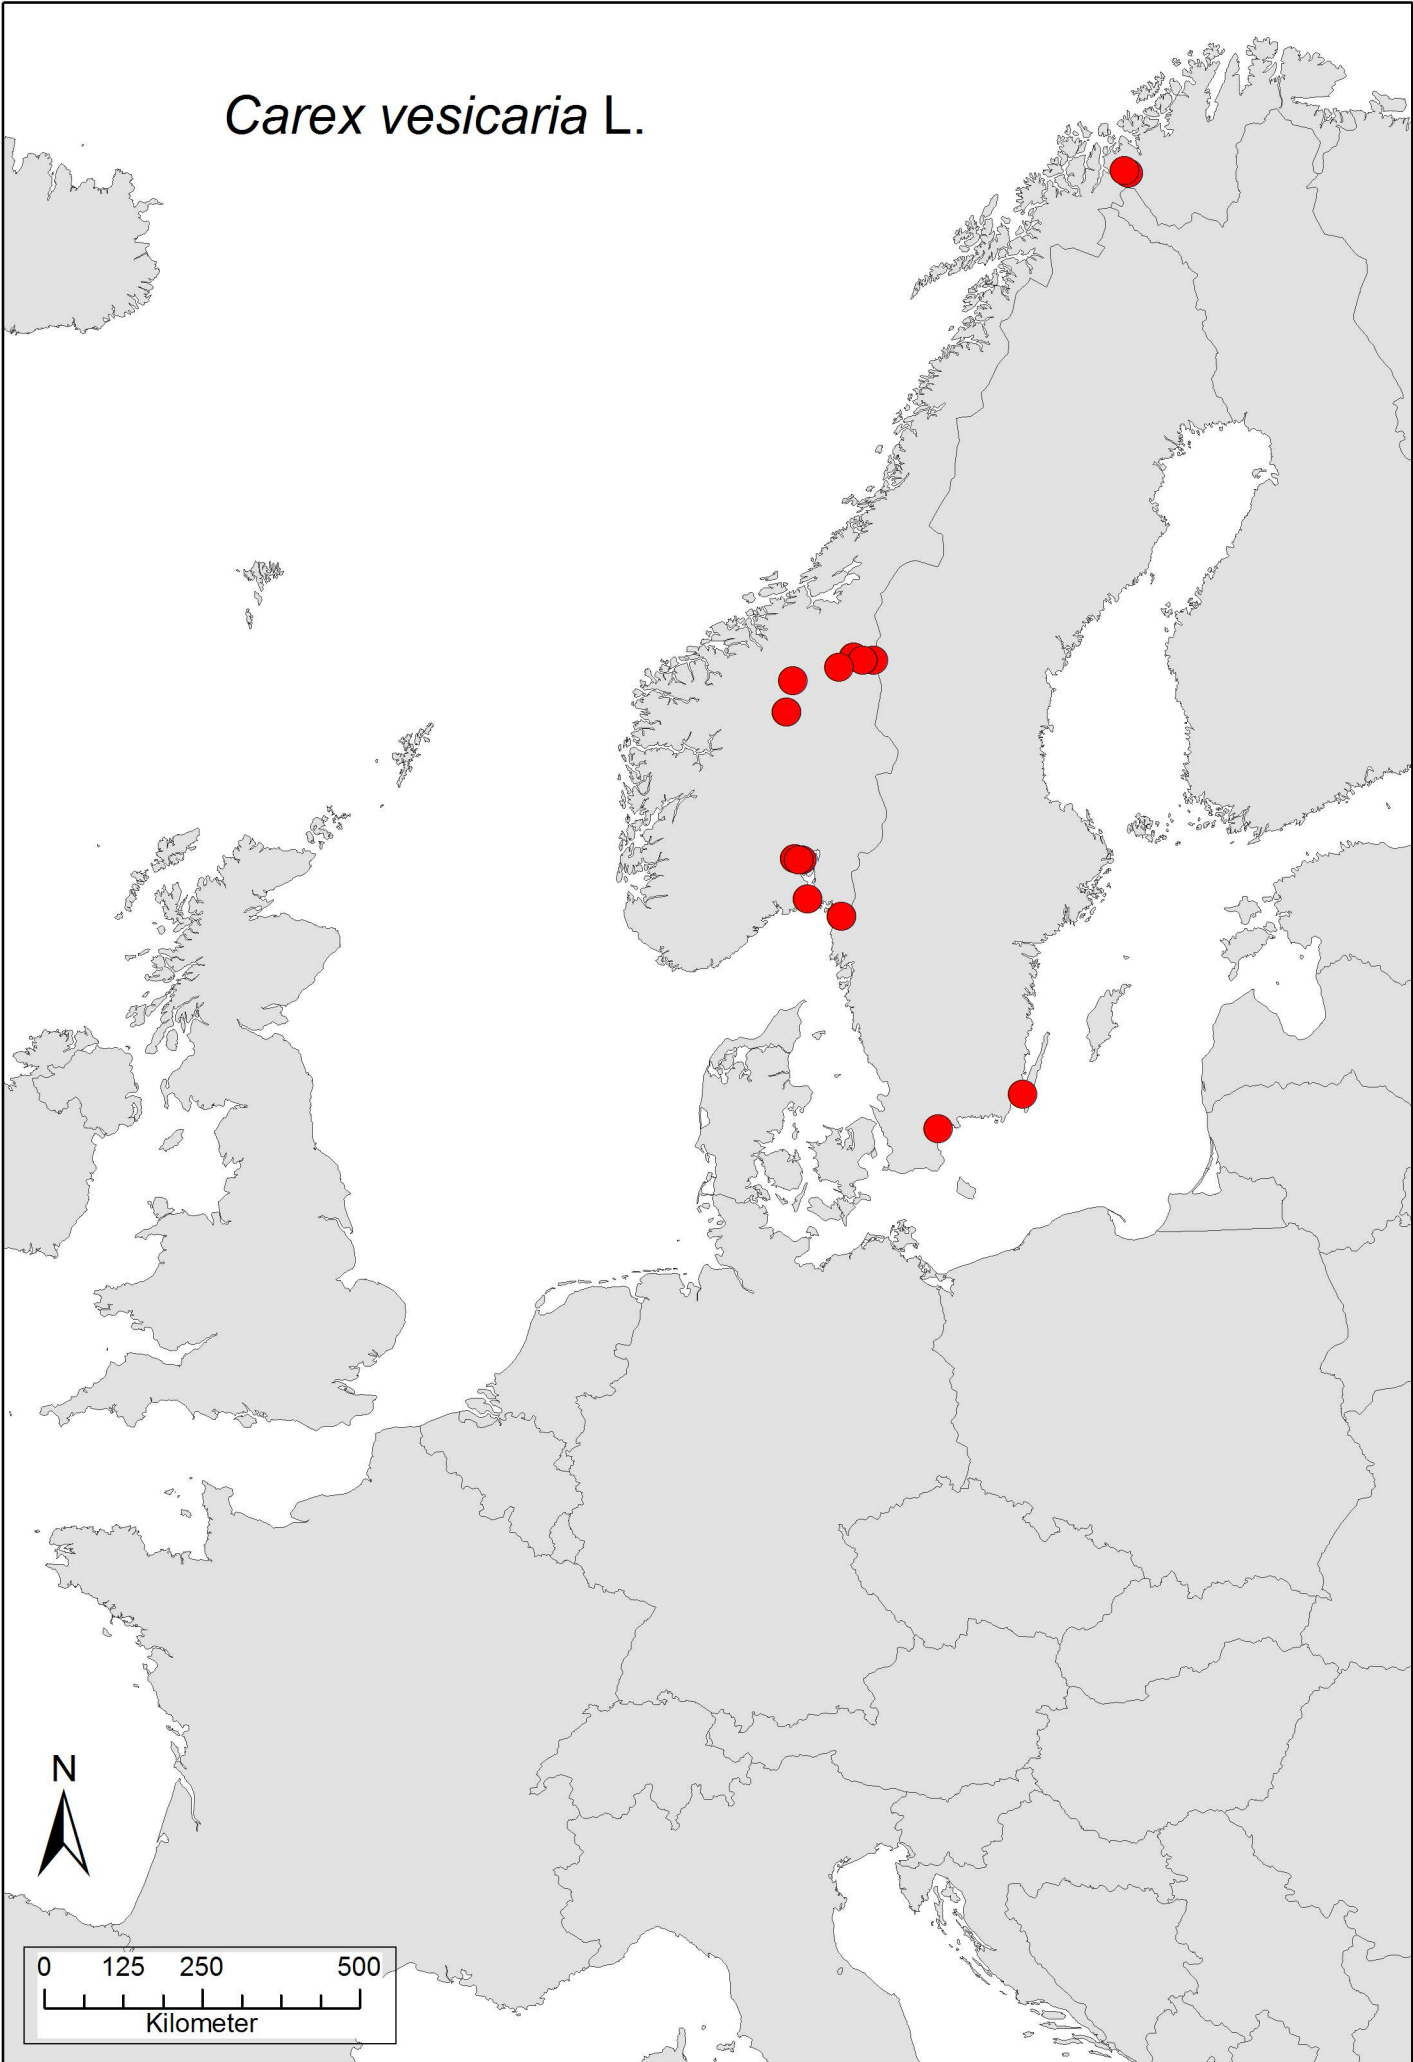

Supplement: pone.0165430.s001.pdf [file pone.0165430.s001.pdf]
